# Supplementary material for: SEATANI: hazards from seamounts in Southeast Asia, Taiwan, and Andaman and Nicobar Islands (eastern India)
Source: Copernicus journal article supplement (doi:10.5194/nhess-24-1203-2024), 2024-04-05
Supplement: Supplementary file 1 [file nhess-24-1203-2024-supplement.zip]

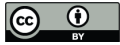

*Supplement of*

**SEATANI: hazards from seamounts in Southeast Asia, Taiwan, and Andaman and Nicobar Islands (eastern India)**

**Andrea Verolino et al.**

*Correspondence to:* Andrea Verolino ([andrea.verolino@ntu.edu.sg](mailto:andrea.verolino@ntu.edu.sg))

- [nhess-24-1203-2024-supplement-title-page.pdf](#)
- [Supplement.pdf](#)
- [Table S1.xlsx](#)
- [Table S2.xlsx](#)

The copyright of individual parts of the supplement might differ from the article licence.
