# Supplementary material for: SEATANI: hazards from seamounts in Southeast Asia, Taiwan, and Andaman and Nicobar Islands (eastern India)
Source: Copernicus journal article supplement (doi:10.5194/nhess-24-1203-2024), 2024-04-05
Supplement: Supplementary file 1 [file Table S1.xlsx]

## Sheet: Sheet1
Table S1. SEATANI dataset.
NAME	Source	LONG	LAT	Base Depth (m)	Summit Depth (m)	Height (m)	Class	Stage	GVP Volcano #	Country EEZ	Population	Cables (km)	Ship_traff (AIS)
Banda Api	GVP	129.881	-4.523	-3073	529	3602	composite	4	265090	Indonesia	18928	0	18329975404
Banua Wuhu	GVP	125.491	3.138	-2358	233	2591	composite	4	267030	Indonesia	213378	342	53682913410
Barren Island	GVP	93.858	12.278	-2586	300	2886	composite	4	260010	India	5259	0	17100221394
Batu Tara	GVP	123.585	-7.791	-3351	577	3928	composite	4	264260	Indonesia	395433	0	79729541151
Colo	GVP	121.601	-0.162	-1636	365	2001	simple cone	4	266010	Indonesia	300275	0	3715357503
Didicas	GVP	122.202	19.077	-2990	-20	2970	composite	3	274020	Philippines	164838	1440.8	30943415844
F_1	Fan et al. (2017)	114.468	17.4788	-3630	-3275	355	simple cone	1	0	Overlapping claim (China)	0	424.3	48716357225
F_10	Fan et al. (2017)	117.48	19.7811	-3177	-2385	792	composite	1	0	Taiwan	0	972.6	44225634344
F_11	Fan et al. (2017)	117.687	19.624	-3799	-2812	987	unknown	1	0	Taiwan	0	788.5	43670621219
F_12	Fan et al. (2017)	117.837	19.5527	-3582	-2798	784	unknown	1	0	Taiwan	0	767.3	43408125914
F_13	Fan et al. (2017)	118.023	19.5812	-3576	-2633	943	composite	1	0	Taiwan	0	947.1	43686714796
F_14	Fan et al. (2017)	118.108	19.3456	-3690	-2853	837	composite	1	0	Taiwan	0	791	45816451522
F_15	Fan et al. (2017)	118.265	19.3956	-3654	-2940	714	composite	1	0	Taiwan	0	979.2	46487012442
F_16	Fan et al. (2017)	118.679	19.4028	-3648	-2869	779	composite	1	0	Philippines	0	1138.3	56020822450
F_17	Fan et al. (2017)	119.051	19.3885	-3742	-2818	924	composite	1	0	Philippines	0	1252.5	80507125057
F_18	Fan et al. (2017)	119.308	19.6954	-3715	-2306	1409	composite	2	0	Philippines	0	1645.5	93444092569
F_19	Fan et al. (2017)	119.365	19.8311	-3477	-2308	1169	composite	2	0	Philippines	0	1641.4	94987233861
F_2	Fan et al. (2017)	114.839	18.107	-3934	-2980	954	simple cone	1	0	Taiwan	0	664.2	46897909808
F_20	Fan et al. (2017)	117.466	20.1773	-2336	-627	1709	composite	3	0	Taiwan	0	1501.4	42956090615
F_21	Fan et al. (2017)	117.965	20.138	-3004	-2306	698	unknown	1	0	Taiwan	0	1662.2	47789584142
F_22	Fan et al. (2017)	118.04	20.1844	-2982	-2462	520	unknown	1	0	Taiwan	0	1715.6	48317663943
F_23	Fan et al. (2017)	119.222	21.1374	-3187	-1628	1559	composite	2	0	Taiwan	0	1767.9	100927000000
F_24	Fan et al. (2017)	118.33	20.0666	-3029	-2373	656	unknown	1	0	Taiwan	0	1714.4	46708823551
F_25	Fan et al. (2017)	118.526	20.1023	-3132	-2306	826	unknown	1	0	Taiwan	0	1782.4	52138585441
F_26	Fan et al. (2017)	118.576	20.2701	-2954	-2362	592	unknown	1	0	Taiwan	0	1934.1	55022656377
F_27	Fan et al. (2017)	118.508	19.7954	-3397	-2597	800	simple cone	1	0	Taiwan	0	1495.7	50692415350
F_28	Fan et al. (2017)	118.744	19.6704	-3424	-2842	582	simple cone	1	0	Philippines	0	1484.3	56578645797
F_29	Fan et al. (2017)	119.186	19.9845	-3421	-2659	762	unknown	1	0	Philippines	0	1651.3	83061338646
F_3	Fan et al. (2017)	115.086	18.2474	-3870	-2695	1175	composite	2	0	Taiwan	0	819.4	46156478204
F_30	Fan et al. (2017)	119.108	20.0488	-3076	-2792	284	composite	1	0	Philippines	0	1711.6	78977513119
F_31	Fan et al. (2017)	119.179	20.2736	-3060	-2370	690	composite	1	0	Taiwan	0	1885.2	81502452825
F_32	Fan et al. (2017)	119.343	20.2272	-3237	-2489	748	composite	1	0	Philippines	0	1835.5	90351826820
F_33	Li et al. (2013)	109.83	8.52295	-1571	-313	1258	composite	3	0	Vietnam	0	1008	66627005218
F_34	Li et al. (2013)	110.475	7.79483	-1604	14	1618	composite	4	0	Vietnam	0	963.7	27812981940
F_35	Li et al. (2013)	109.697	7.27418	-1483	50	1533	composite	4	0	Vietnam	0	1073.6	37025847882
F_4	Fan et al. (2017)	115.517	18.8959	-3676	-2376	1300	unknown	2	0	Taiwan	0	1099	47784576936
F_5	Fan et al. (2017)	115.36	19.6098	-2414	-1773	641	unknown	1	0	Taiwan	0	908.8	52023048324
F_6	Fan et al. (2017)	117.009	19.1029	-3773	-2603	1170	composite	2	0	Taiwan	0	491.4	40679985260
F_7	Fan et al. (2017)	117.059	19.6455	-3382	-1739	1643	composite	2	0	Taiwan	0	702.3	39703599541
F_8	Fan et al. (2017)	117.195	19.7311	-3402	-1644	1758	composite	2	0	Taiwan	0	847.7	40841144072
F_9	Fan et al. (2017)	117.344	19.7597	-3256	-2226	1030	composite	2	0	Taiwan	0	952.4	42996058388
Gilibanta	GVP	119.32	-8.42	-1793	514	2307	composite	4	264839	Indonesia	934891	217.9	74632328610
Gunungapi Wetar	GVP	126.65	-6.642	-4404	164	4568	composite	4	265030	Indonesia	1	0	16788809936
Huapinghsu	GVP	121.946	25.424	-345	-34	311	composite	3	281803	Taiwan	9619848	2609	772587000000
Ile des Cendres	GVP	109.014	10.158	-141	-3	138	composite	3	275060	Vietnam	28953	545	66721662855
Kawalusu	GVP	125.329	4.232	-3921	166	4087	composite	4	267070	Indonesia	136285	0	43842802148
Kawio Barat	GVP	125.088	4.675	-5778	-1949	3829	simple cone	2	267090	Indonesia	22981	0	59125935708
Krakatau	GVP	105.423	-6.102	-250	613	863	composite	4	262000	Indonesia	7976356	993	136150000000
KW-10165	K&W + Gevorgian et al. (2022)	120.93	-12.51	-3290	-1350	1940	composite	2	0	Indonesia	0	0	34974768496
KW-10166	K&W + Gevorgian et al. (2022)	119.64	-12.23	-4904	-2743	2161	guyot	5	0	Indonesia	0	0	1126579984
KW-10169	K&W + Gevorgian et al. (2022)	114.54	-11.93	-5593	-3171	2422	composite	2	0	Indonesia	0	0	11907216902
KW-10170	K&W + Gevorgian et al. (2022)	114.01	-12.01	-5031	-3484	1547	unknown	2	0	Indonesia	0	0	1634058459
KW-10171	K&W + Gevorgian et al. (2022)	109.21	-10.79	-5009	-2624	2385	unknown	2	0	Indonesia	0	0	2836366829
KW-10172	K&W + Gevorgian et al. (2022)	108.69	-10.76	-5989	-3421	2568	unknown	2	0	Indonesia	0	0	2855906804
KW-10175	K&W + Gevorgian et al. (2022)	108.68	-10.58	-6441	-3430	3011	simple cone	2	0	Indonesia	0	0	2741448852
KW-10176	K&W + Gevorgian et al. (2022)	111.04	-10.64	-6042	-4370	1672	composite	2	0	Indonesia	0	0	4108954241
KW-10177	K&W + Gevorgian et al. (2022)	109.09	-11.01	-5924	-3474	2450	unknown	2	0	Indonesia	0	0	3087427703
KW-10179	K&W + Gevorgian et al. (2022)	112.31	-11.28	-4154	-3028	1126	composite	2	0	Indonesia	0	0	18667103087
KW-10374	K&W + Gevorgian et al. (2022)	99.41	-4.39	-4757	-961	3796	composite	2	0	Indonesia	0	0	9038793102
KW-10375	K&W + Gevorgian et al. (2022)	98.69	-4.29	-5067	-3819	1248	unknown	2	0	Indonesia	0	0	7770196793
KW-10376	K&W + Gevorgian et al. (2022)	99.21	-3.96	-5157	-3812	1345	composite	2	0	Indonesia	0	0	9427475257
KW-10379	K&W + Gevorgian et al. (2022)	98.31	-4.41	-4928	-3067	1861	unknown	2	0	Indonesia	0	0	6162653497
KW-10395	K&W + Gevorgian et al. (2022)	97.93	-1.98	-5537	-4378	1159	composite	2	0	Indonesia	0	0	3118790067
KW-10396	K&W + Gevorgian et al. (2022)	96.53	-0.69	-5179	-3634	1545	composite	2	0	Indonesia	0	0	3854619427
KW-10397	K&W + Gevorgian et al. (2022)	95.08	-1.89	-4856	-3438	1418	composite	2	0	Indonesia	0	0	9188890143
KW-10399	K&W + Gevorgian et al. (2022)	95.66	-1.81	-4823	-3562	1261	unknown	2	0	Indonesia	0	0	7580662759
KW-10401	K&W + Gevorgian et al. (2022)	96.34	-1.53	-4423	-2584	1839	caldera	2	0	Indonesia	0	0	2807761565
KW-10403	K&W + Gevorgian et al. (2022)	96.43	-0.94	-4730	-3403	1327	unknown	2	0	Indonesia	0	0	2580379524
KW-10404	K&W + Gevorgian et al. (2022)	95.86	-1.79	-5047	-3873	1174	unknown	2	0	Indonesia	0	0	6708641504
KW-10405	K&W + Gevorgian et al. (2022)	95.79	-1.64	-4904	-4020	884	unknown	1	0	Indonesia	0	0	5719825558
KW-10407	K&W + Gevorgian et al. (2022)	95.41	-2.08	-4930	-4378	552	unknown	1	0	Indonesia	0	0	9037393422
KW-11634	K&W + Gevorgian et al. (2022)	141.18	-1.59	-3842	-2403	1439	unknown	2	0	Indonesia	0	0	41579750938
KW-11639	K&W + Gevorgian et al. (2022)	140.78	-1.89	-3603	-2112	1491	unknown	2	0	Indonesia	548911	0	49710870271
KW-11641	K&W + Gevorgian et al. (2022)	140.33	-1.24	-3303	-2569	734	unknown	1	0	Indonesia	150	0	38924903095
KW-11642	K&W + Gevorgian et al. (2022)	139.03	-0.84	-4522	-3510	1012	unknown	2	0	Indonesia	0	0	38786893758
KW-11644	K&W + Gevorgian et al. (2022)	139.39	1.34	-4343	-3893	450	unknown	1	0	Indonesia	0	0	26210325942
KW-11645	K&W + Gevorgian et al. (2022)	140.14	-1.19	-3400	-2416	984	unknown	1	0	Indonesia	0	0	39104974775
KW-11647	K&W + Gevorgian et al. (2022)	139.33	-0.61	-3926	-3295	631	composite	1	0	Indonesia	0	0	31494310639
KW-11648	K&W + Gevorgian et al. (2022)	140.51	-1.41	-3789	-2656	1133	composite	2	0	Indonesia	0	0	41793820357
KW-11649	K&W + Gevorgian et al. (2022)	140.31	-1.49	-3567	-2523	1044	composite	2	0	Indonesia	3243	0	47184823929
KW-11654	K&W + Gevorgian et al. (2022)	134.34	0.93	-3311	57	3368	guyot	5	0	Indonesia	451	0	26340998829
KW-11655	K&W + Gevorgian et al. (2022)	134.31	0.81	-3664	60	3724	guyot	5	0	Indonesia	451	0	25374757329
KW-11656	K&W + Gevorgian et al. (2022)	134.28	-0.28	-3374	-73	3301	composite	3	0	Indonesia	198714	0	39511242342
KW-11657	K&W + Gevorgian et al. (2022)	134.08	0.74	-4333	-1367	2966	composite	2	0	Indonesia	451	0	23546143008
KW-11658	K&W + Gevorgian et al. (2022)	133.88	-0.36	-3364	-1696	1668	unknown	2	0	Indonesia	220378	0	41927994883
KW-11659	K&W + Gevorgian et al. (2022)	133.91	1.74	-5168	-3093	2075	composite	2	0	Indonesia	15	0	24876722033
KW-11660	K&W + Gevorgian et al. (2022)	133.99	-0.13	-3774	-1912	1862	unknown	2	0	Indonesia	198254	0	40133539269
KW-11661	K&W + Gevorgian et al. (2022)	134.23	1.23	-4920	-1571	3349	composite	2	0	Indonesia	451	0	26573173258
KW-11662	K&W + Gevorgian et al. (2022)	134.18	1.83	-5013	-2527	2486	composite	2	0	Indonesia	15	0	23239516428
KW-11663	K&W + Gevorgian et al. (2022)	133.76	2.23	-4605	-3092	1513	unknown	2	0	Indonesia	0	0	21895533115
KW-11664	K&W + Gevorgian et al. (2022)	135.66	1.38	-4567	-3417	1150	unknown	2	0	Indonesia	0	0	21840825267
KW-11665	K&W + Gevorgian et al. (2022)	133.74	1.83	-4787	-3179	1608	composite	2	0	Indonesia	0	0	25202418081
KW-11666	K&W + Gevorgian et al. (2022)	136.23	1.23	-4447	-3474	973	unknown	1	0	Indonesia	0	0	19750736623
KW-11667	K&W + Gevorgian et al. (2022)	134.09	2.09	-4652	-2182	2470	composite	2	0	Indonesia	0	0	21690536197
KW-11668	K&W + Gevorgian et al. (2022)	133.91	0.44	-4096	-3127	969	composite	1	0	Indonesia	451	0	18527680143
KW-11669	K&W + Gevorgian et al. (2022)	133.63	2.51	-4527	-3350	1177	unknown	2	0	Indonesia	0	0	17139325017
KW-11670	K&W + Gevorgian et al. (2022)	136.53	1.49	-4256	-2731	1525	composite	2	0	Indonesia	0	0	13960840756
KW-11671	K&W + Gevorgian et al. (2022)	135.96	1.33	-4477	-3606	871	unknown	2	0	Indonesia	0	0	20238444948
KW-11672	K&W + Gevorgian et al. (2022)	133.66	2.03	-4786	-3628	1158	unknown	1	0	Indonesia	0	0	24018422864
KW-11731	K&W + Gevorgian et al. (2022)	133.96	2.79	-5029	-3216	1813	composite	2	0	Indonesia	0	0	11327472366
KW-11743	K&W + Gevorgian et al. (2022)	134.69	3.13	-4864	-3537	1327	composite	2	0	Indonesia	0	0	10074896372
KW-21637	K&W + Gevorgian et al. (2022)	125.58	18.69	-6161	-2670	3491	simple cone	2	0	Philippines	0	984.1	58505108153
KW-21641	K&W + Gevorgian et al. (2022)	125.93	17.71	-4507	-2610	1897	unknown	2	0	Philippines	0	461.2	71631127330
KW-21643	K&W + Gevorgian et al. (2022)	126.23	15.24	-6118	-4358	1760	unknown	2	0	Philippines	0	0	73912434508
KW-21645	K&W + Gevorgian et al. (2022)	125.56	16.84	-4233	-2387	1846	unknown	2	0	Philippines	0	192.6	75139426510
KW-21648	K&W + Gevorgian et al. (2022)	125.78	18.48	-6258	-3970	2288	composite	2	0	Philippines	0	853.2	65969037338
KW-21649	K&W + Gevorgian et al. (2022)	125.38	14.51	-6833	-5031	1802	composite	2	0	Philippines	0	0	76979279442
KW-21651	K&W + Gevorgian et al. (2022)	124.28	15.81	-3473	147	3620	composite	4	0	Philippines	0	207.7	49698159302
KW-21652	K&W + Gevorgian et al. (2022)	123.08	17.23	-5200	-2653	2547	unknown	2	0	Philippines	28059	0	20096958385
KW-21653	K&W + Gevorgian et al. (2022)	124.16	16.61	-3855	-1321	2534	caldera	2	0	Philippines	0	142.9	38355124136
KW-21654	K&W + Gevorgian et al. (2022)	123.26	18.33	-5174	-2579	2595	composite	2	0	Philippines	380	565.2	28337087178
KW-21655	K&W + Gevorgian et al. (2022)	123.61	16.73	-4481	-2806	1675	unknown	2	0	Philippines	0	0	25663102129
KW-21656	K&W + Gevorgian et al. (2022)	124.51	19.29	-5737	-4694	1043	composite	2	0	Philippines	0	1469.4	28698834547
KW-21657	K&W + Gevorgian et al. (2022)	123.84	18.63	-5536	-3258	2278	composite	2	0	Philippines	0	1112.5	27458869741
KW-21775	K&W + Gevorgian et al. (2022)	125.44	21.14	-6079	-3178	2901	composite	2	0	Philippines	0	589.2	45419520104
KW-21782	K&W + Gevorgian et al. (2022)	125.68	19.49	-6386	-4571	1815	composite	2	0	Philippines	0	1013.3	60760068679
KW-21792	K&W + Gevorgian et al. (2022)	121.43	21.13	-3741	-504	3237	guyot	5	0	Philippines	17420	1642.1	162533000000
KW-21793	K&W + Gevorgian et al. (2022)	121.49	22.29	-4190	-180	4010	composite	3	0	Taiwan	398059	220.4	282667000000
KW-21794	K&W + Gevorgian et al. (2022)	121.59	21.58	-2654	-24	2630	composite	3	0	Taiwan	40928	1161.1	211310000000
KW-21795	K&W + Gevorgian et al. (2022)	121.58	21.74	-2508	9	2517	composite	4	0	Taiwan	69451	832.6	234639000000
KW-21796	K&W + Gevorgian et al. (2022)	121.56	21.19	-2839	-508	2331	guyot	5	0	Philippines	20987	1609.1	162849000000
KW-21797	K&W + Gevorgian et al. (2022)	123.83	21.79	-5560	-2286	3274	composite	2	0	Philippines	0	1452.5	89339039650
KW-21798	K&W + Gevorgian et al. (2022)	124.58	21.51	-5939	-4196	1743	composite	2	0	Philippines	0	1337.9	46524543914
KW-21799	K&W + Gevorgian et al. (2022)	125.34	19.56	-6467	-4894	1573	unknown	2	0	Philippines	0	1205.2	47194685728
KW-21802	K&W + Gevorgian et al. (2022)	125.44	19.84	-6444	-4828	1616	unknown	2	0	Philippines	0	1147.3	50450338584
KW-21803	K&W + Gevorgian et al. (2022)	125.16	20.06	-6229	-4795	1434	composite	2	0	Philippines	0	1038.7	37163393416
KW-22102	K&W + Gevorgian et al. (2022)	126.01	12.79	-7331	-4397	2934	composite	2	0	Philippines	131204	0	83261530846
KW-22103	K&W + Gevorgian et al. (2022)	127.04	10.88	-6682	-3458	3224	composite	2	0	Philippines	0	0	87440729609
KW-22104	K&W + Gevorgian et al. (2022)	125.84	13.28	-7272	-4335	2937	unknown	2	0	Philippines	0	0	70510938244
KW-22105	K&W + Gevorgian et al. (2022)	126.73	10.89	-9046	-5652	3394	composite	2	0	Philippines	3957	0	105797000000
KW-22106	K&W + Gevorgian et al. (2022)	125.58	13.81	-6701	-5739	962	unknown	1	0	Philippines	0	0	61938902003
KW-22107	K&W + Gevorgian et al. (2022)	127.58	8.68	-6237	-5305	932	unknown	1	0	Philippines	0	0	82767175318
KW-22108	K&W + Gevorgian et al. (2022)	127.81	13.64	-5465	-3876	1589	unknown	2	0	Philippines	0	0	45751813540
KW-22109	K&W + Gevorgian et al. (2022)	127.31	13.69	-5774	-4379	1395	unknown	2	0	Philippines	0	0	62029786900
KW-22110	K&W + Gevorgian et al. (2022)	126.81	13.53	-6853	-3222	3631	composite	2	0	Philippines	0	0	72656851952
KW-22111	K&W + Gevorgian et al. (2022)	128.16	14.03	-6255	-4483	1772	unknown	2	0	Philippines	0	0	35223293911
KW-22113	K&W + Gevorgian et al. (2022)	127.38	10.69	-6107	-5310	797	unknown	1	0	Philippines	0	438.6	74588801191
KW-22115	K&W + Gevorgian et al. (2022)	128.33	13.76	-6403	-4264	2139	composite	2	0	Philippines	0	0	33936183437
KW-22264	K&W + Gevorgian et al. (2022)	128.41	5.89	-5310	-2337	2973	composite	2	0	Indonesia	0	0	45582405936
KW-22265	K&W + Gevorgian et al. (2022)	128.38	6.21	-6090	-4042	2048	composite	2	0	Indonesia	0	0	44876695440
KW-22266	K&W + Gevorgian et al. (2022)	129.59	6.96	-5727	-4076	1651	composite	2	0	Philippines	0	0	18554204321
KW-22267	K&W + Gevorgian et al. (2022)	128.04	6.44	-6455	-5311	1144	unknown	2	0	Philippines	0	0	57714266535
KW-22268	K&W + Gevorgian et al. (2022)	129.58	7.39	-5953	-5213	740	unknown	1	0	Philippines	0	0	21264421909
KW-22287	K&W + Gevorgian et al. (2022)	130.81	1.84	-4245	-1981	2264	composite	2	0	Indonesia	121	0	13751157946
KW-22288	K&W + Gevorgian et al. (2022)	132.51	1.41	-4651	-2240	2411	unknown	2	0	Indonesia	0	0	23378095304
KW-22289	K&W + Gevorgian et al. (2022)	131.44	1.64	-4493	-1013	3480	composite	2	0	Indonesia	148	0	16422252983
KW-22292	K&W + Gevorgian et al. (2022)	131.26	1.68	-4038	-2004	2034	composite	2	0	Indonesia	148	0	14940761881
KW-22295	K&W + Gevorgian et al. (2022)	131.94	0.23	-4385	-3158	1227	unknown	2	0	Indonesia	14990	0	28119216527
KW-22297	K&W + Gevorgian et al. (2022)	131.31	1.98	-4318	-2942	1376	composite	2	0	Indonesia	3	0	22624998802
KW-22301	K&W + Gevorgian et al. (2022)	129.46	2.33	-4015	-499	3516	unknown	3	0	Indonesia	18472	0	21728420574
KW-22302	K&W + Gevorgian et al. (2022)	129.53	1.61	-4958	-3541	1417	composite	2	0	Indonesia	7666	0	20984289149
KW-22303	K&W + Gevorgian et al. (2022)	129.04	4.29	-5760	-3589	2171	composite	2	0	Indonesia	0	335.6	34179452659
KW-22304	K&W + Gevorgian et al. (2022)	129.51	3.94	-5105	-3909	1196	composite	2	0	Indonesia	0	389.9	29624524454
KW-22306	K&W + Gevorgian et al. (2022)	129.09	3.94	-5482	-3822	1660	composite	2	0	Indonesia	0	388.2	35147978344
KW-23604	K&W + Gevorgian et al. (2022)	111.19	10.88	-3790	-629	3161	composite	3	0	Vietnam	0	788.9	59082363856
KW-23605	K&W + Gevorgian et al. (2022)	111.23	10.13	-3963	-862	3101	composite	2	0	Vietnam	0	837.5	51074750249
KW-23606	K&W + Gevorgian et al. (2022)	111.04	10.66	-3787	-975	2812	composite	2	0	Vietnam	0	953.9	60093081734
KW-23607	K&W + Gevorgian et al. (2022)	114.04	11.51	-4435	-2316	2119	unknown	2	0	Overlapping claim (China)	720	492	20595649673
KW-23608	K&W + Gevorgian et al. (2022)	111.74	12.04	-4269	-2544	1725	composite	2	0	Vietnam	0	659.1	58309106912
KW-23609	K&W + Gevorgian et al. (2022)	112.51	12.13	-4484	-3131	1353	composite	2	0	Vietnam	0	286.8	45340523494
KW-23610	K&W + Gevorgian et al. (2022)	115.91	12.19	-4656	-2793	1863	composite	2	0	Overlapping claim (China)	0	160.5	13746045076
KW-23611	K&W + Gevorgian et al. (2022)	116.51	12.06	-3988	-604	3384	composite	3	0	Philippines	0	360.1	8939787117
KW-23612	K&W + Gevorgian et al. (2022)	112.34	13.66	-3018	-237	2781	caldera	3	0	Vietnam	0	726.3	49676051617
KW-23613	K&W + Gevorgian et al. (2022)	113.21	13.96	-4291	-1015	3276	composite	2	0	Overlapping claim (China)	0	575.8	37255956884
KW-23614	K&W + Gevorgian et al. (2022)	113.08	13.36	-4376	-697	3679	composite	3	0	Overlapping claim (China)	0	425.5	37043329557
KW-23615	K&W + Gevorgian et al. (2022)	112.76	14.36	-3460	-1697	1763	composite	2	0	Overlapping claim (China)	0	827.2	49068947498
KW-23616	K&W + Gevorgian et al. (2022)	112.24	13.31	-3188	-1320	1868	composite	2	0	Vietnam	0	521.6	50628950246
KW-23617	K&W + Gevorgian et al. (2022)	113.19	15.49	-3831	-142	3689	composite	3	0	Overlapping claim (China)	0	292.7	55747526859
KW-23618	K&W + Gevorgian et al. (2022)	111.34	13.58	-2906	-1020	1886	composite	2	0	Vietnam	0	1127	44958737679
KW-23619	K&W + Gevorgian et al. (2022)	112.46	14.18	-2829	-1184	1645	unknown	2	0	Vietnam	0	966.3	50521766954
KW-23620	K&W + Gevorgian et al. (2022)	111.99	13.91	-2516	-1166	1350	composite	2	0	Vietnam	0	1218.3	50955223613
KW-23621	K&W + Gevorgian et al. (2022)	111.73	12.91	-3620	-2086	1534	composite	2	0	Vietnam	0	883.6	52003243481
KW-23622	K&W + Gevorgian et al. (2022)	114.54	13.38	-4592	-3330	1262	composite	2	0	Overlapping claim (China)	0	849.1	36208797974
KW-23623	K&W + Gevorgian et al. (2022)	112.56	13.36	-2971	-602	2369	composite	3	0	Vietnam	0	398	47424391260
KW-23624	K&W + Gevorgian et al. (2022)	111.88	12.78	-4041	-2518	1523	unknown	2	0	Vietnam	0	700.8	53007438610
KW-23625	K&W + Gevorgian et al. (2022)	111.39	12.76	-2815	-1730	1085	unknown	2	0	Vietnam	0	1077.8	52516729818
KW-23626	K&W + Gevorgian et al. (2022)	111.09	13.04	-2978	-2284	694	unknown	1	0	Vietnam	0	1062.6	49282325554
KW-23627	K&W + Gevorgian et al. (2022)	111.34	13.08	-2823	-1841	982	unknown	1	0	Vietnam	0	1115.9	51243920934
KW-23629	K&W + Gevorgian et al. (2022)	117.76	15.16	-4026	254	4280	guyot	5	0	Philippines	0	1162.2	32762792246
KW-23630	K&W + Gevorgian et al. (2022)	118.71	17.19	-4084	-182	3902	composite	3	0	Philippines	0	929.4	64035378010
KW-23631	K&W + Gevorgian et al. (2022)	115.43	13.98	-4348	-223	4125	composite	3	0	Overlapping claim (China)	0	575.6	32501959282
KW-23632	K&W + Gevorgian et al. (2022)	116.54	15.08	-4268	-293	3975	composite	3	0	Philippines	0	764.3	31039138190
KW-23633	K&W + Gevorgian et al. (2022)	116.69	16.61	-4102	-175	3927	composite	3	0	Philippines	0	413.5	51664638262
KW-23634	K&W + Gevorgian et al. (2022)	117.14	15.16	-4331	-438	3893	composite	3	0	Philippines	0	893.1	30452677533
KW-23635	K&W + Gevorgian et al. (2022)	114.89	14.01	-4387	-532	3855	composite	3	0	Overlapping claim (China)	0	684.4	41662831819
KW-23636	K&W + Gevorgian et al. (2022)	116.19	15.56	-4519	-619	3900	composite	3	0	Overlapping claim (China)	0	784.8	43446942829
KW-23637	K&W + Gevorgian et al. (2022)	115.39	14.38	-4423	-865	3558	composite	2	0	Overlapping claim (China)	0	682.2	39602338776
KW-23638	K&W + Gevorgian et al. (2022)	117.51	15.86	-4337	-1828	2509	composite	2	0	Philippines	0	856.1	37531884452
KW-23639	K&W + Gevorgian et al. (2022)	118.29	15.29	-4242	-846	3396	composite	2	0	Philippines	0	1070.8	48148544022
KW-23640	K&W + Gevorgian et al. (2022)	115.31	13.71	-4346	-713	3633	composite	2	0	Overlapping claim (China)	0	700.5	30208754495
KW-23641	K&W + Gevorgian et al. (2022)	114.96	13.38	-4421	-721	3700	composite	2	0	Overlapping claim (China)	0	769.6	29280767805
KW-23642	K&W + Gevorgian et al. (2022)	114.94	16.83	-3491	-478	3013	composite	3	0	Overlapping claim (China)	0	435.9	29603880335
KW-23643	K&W + Gevorgian et al. (2022)	116.78	15.91	-4277	-1485	2792	composite	2	0	Philippines	0	629.3	42723341507
KW-23644	K&W + Gevorgian et al. (2022)	118.59	16.74	-4137	-625	3512	composite	3	0	Philippines	0	822.8	64873214897
KW-23645	K&W + Gevorgian et al. (2022)	114.86	16.84	-2994	-1650	1344	composite	2	0	Overlapping claim (China)	0	377.7	30554332703
KW-23646	K&W + Gevorgian et al. (2022)	118.61	15.49	-4129	-1162	2967	unknown	2	0	Philippines	0	900.9	89264500114
KW-23647	K&W + Gevorgian et al. (2022)	116.36	14.93	-4411	-1577	2834	composite	2	0	Overlapping claim (China)	0	660.7	31255914171
KW-23648	K&W + Gevorgian et al. (2022)	115.08	16.66	-3888	-590	3298	composite	3	0	Overlapping claim (China)	0	484.6	29086251553
KW-23649	K&W + Gevorgian et al. (2022)	115.36	17.04	-3466	-639	2827	composite	3	0	Overlapping claim (China)	0	609.4	29131133076
KW-23650	K&W + Gevorgian et al. (2022)	116.09	16.36	-4305	-1483	2822	composite	2	0	Overlapping claim (China)	0	684.4	51166681377
KW-23651	K&W + Gevorgian et al. (2022)	115.04	17.08	-3049	-614	2435	composite	3	0	Overlapping claim (China)	0	546.2	30196637626
KW-23652	K&W + Gevorgian et al. (2022)	114.58	17.03	-3438	-1830	1608	unknown	2	0	Overlapping claim (China)	0	397.2	41089061256
KW-23653	K&W + Gevorgian et al. (2022)	115.64	14.83	-4477	-2586	1891	composite	2	0	Overlapping claim (China)	0	609.7	41980675936
KW-23654	K&W + Gevorgian et al. (2022)	118.56	13.28	-3565	-2215	1350	composite	2	0	Philippines	0	543.6	77199104958
KW-23655	K&W + Gevorgian et al. (2022)	115.18	17.09	-3036	-1836	1200	composite	2	0	Overlapping claim (China)	0	592	28935795622
KW-23656	K&W + Gevorgian et al. (2022)	118.81	16.93	-4177	-2271	1906	composite	2	0	Philippines	0	663.7	104642000000
KW-23657	K&W + Gevorgian et al. (2022)	118.89	16.48	-4305	-196	4109	composite	3	0	Philippines	5834	439	205078000000
KW-23658	K&W + Gevorgian et al. (2022)	115.06	17.38	-3716	-1854	1862	composite	2	0	Overlapping claim (China)	0	616.2	33693164301
KW-23659	K&W + Gevorgian et al. (2022)	118.23	13.44	-3955	-118	3837	composite	3	0	Philippines	0	610.1	56336755782
KW-23660	K&W + Gevorgian et al. (2022)	116.28	16.41	-4232	-1452	2780	composite	2	0	Overlapping claim (China)	0	662.7	52716012393
KW-23661	K&W + Gevorgian et al. (2022)	117.98	14.58	-4392	-3406	986	unknown	1	0	Philippines	0	1020.3	32333894009
KW-23662	K&W + Gevorgian et al. (2022)	115.99	12.69	-4488	-3043	1445	composite	2	0	Overlapping claim (China)	0	304.8	20103492718
KW-23663	K&W + Gevorgian et al. (2022)	116.74	16.08	-4223	-2054	2169	composite	2	0	Philippines	0	555.8	45442287218
KW-23664	K&W + Gevorgian et al. (2022)	114.93	15.03	-4331	-2294	2037	composite	2	0	Overlapping claim (China)	0	641.2	46508238196
KW-23665	K&W + Gevorgian et al. (2022)	114.79	17.11	-3345	-1750	1595	unknown	2	0	Overlapping claim (China)	0	394.2	36482743548
KW-23666	K&W + Gevorgian et al. (2022)	114.64	16.76	-3174	-924	2250	unknown	2	0	Overlapping claim (China)	0	396	34136674886
KW-23667	K&W + Gevorgian et al. (2022)	115.78	13.41	-4562	-3144	1418	composite	2	0	Overlapping claim (China)	0	637	25010480082
KW-23668	K&W + Gevorgian et al. (2022)	118.21	12.84	-3618	-1914	1704	unknown	2	0	Philippines	0	538.6	55128206790
KW-23669	K&W + Gevorgian et al. (2022)	115.33	17.39	-3788	-1946	1842	composite	2	0	Overlapping claim (China)	0	618	29100755251
KW-23670	K&W + Gevorgian et al. (2022)	118.78	16.33	-4314	-3192	1122	composite	2	0	Philippines	0	587.7	164282000000
KW-23671	K&W + Gevorgian et al. (2022)	115.51	14.99	-4351	-3421	930	composite	1	0	Overlapping claim (China)	0	635	46967692642
KW-23672	K&W + Gevorgian et al. (2022)	118.33	14.08	-4135	-2812	1323	composite	2	0	Philippines	0	805.9	57696295069
KW-23673	K&W + Gevorgian et al. (2022)	118.71	13.96	-4036	-2878	1158	composite	2	0	Philippines	0	678.5	86178984115
KW-23674	K&W + Gevorgian et al. (2022)	118.44	13.41	-3709	-1519	2190	composite	2	0	Philippines	0	669	67384595802
KW-23675	K&W + Gevorgian et al. (2022)	115.38	15.16	-4332	-3870	462	composite	1	0	Overlapping claim (China)	0	683	48842722061
KW-23676	K&W + Gevorgian et al. (2022)	116.84	14.73	-4374	-3512	862	composite	1	0	Philippines	0	695.2	26835385239
KW-23677	K&W + Gevorgian et al. (2022)	114.96	13.63	-4428	-3327	1101	composite	2	0	Overlapping claim (China)	0	779.8	32564682908
KW-23678	K&W + Gevorgian et al. (2022)	117.09	17.63	-4164	-1610	2554	composite	2	0	Philippines	0	548.4	53935618552
KW-23679	K&W + Gevorgian et al. (2022)	119.16	19.58	-3777	-2311	1466	composite	2	0	Philippines	0	1496.4	85411645633
KW-23680	K&W + Gevorgian et al. (2022)	118.29	19.81	-3460	-2103	1357	composite	2	0	Taiwan	0	1411.2	45669330381
KW-23681	K&W + Gevorgian et al. (2022)	118.98	19.76	-3455	-2033	1422	composite	2	0	Philippines	0	1640.7	72179569845
KW-23682	K&W + Gevorgian et al. (2022)	116.86	18.94	-4693	-2805	1888	composite	2	0	Taiwan	0	763.1	40166356790
KW-23683	K&W + Gevorgian et al. (2022)	116.69	18.56	-3981	-2739	1242	composite	2	0	Taiwan	0	880.8	40021528665
Lipang	GVP	125.39	3.911	-3360	122	3482	simple cone	4	267060	Indonesia	141801	50.7	38116594602
Manuk	GVP	130.303	-5.543	-3513	6	3519	simple cone	4	265080	Indonesia	234	0	20263091006
Mienhuayu	GVP	122.106	25.484	-668	16	684	simple cone	4	281804	Taiwan	8200825	2793	722341000000
Napo Taroare	GVP	125.345	4.048	-3730	140	3870	composite	4	267065	Indonesia	140474	0	39192343736
Narcondum	GVP	94.28	13.43	-1801	244	2045	composite	4	260001	India	0	0	40143001288
New-00214	K&W + Gevorgian et al. (2022)	118.29	20.46	-3381	-1730	1651	composite	2	0	Taiwan	0	2071.3	52133454054
New-00215	K&W + Gevorgian et al. (2022)	117.98	20.49	-2584	-240	2344	simple cone	3	0	Taiwan	0	2010.9	51338578383
New-00216	K&W + Gevorgian et al. (2022)	118.69	20.53	-2939	-2271	668	unknown	1	0	Taiwan	0	2108.3	58882222134
New-00217	K&W + Gevorgian et al. (2022)	119.41	19.91	-3440	-2027	1413	composite	2	0	Philippines	0	1615.8	96925011266
New-00218	K&W + Gevorgian et al. (2022)	118.69	19.98	-3249	-1857	1392	simple cone	2	0	Taiwan	0	1704	54631946594
New-00219	K&W + Gevorgian et al. (2022)	117.68	20.06	-3029	-1887	1142	unknown	2	0	Taiwan	0	1397.3	46326067472
New-00220	K&W + Gevorgian et al. (2022)	117.34	20.21	-2040	-42	1998	composite	3	0	Taiwan	0	1507.5	39524848312
New-00221	K&W + Gevorgian et al. (2022)	115.98	20.24	-1039	-310	729	unknown	3	0	Taiwan	0	1017.7	62293428401
New-00222	K&W + Gevorgian et al. (2022)	116.33	19.96	-1536	-998	538	unknown	1	0	Taiwan	0	867.5	56028339593
New-00223	K&W + Gevorgian et al. (2022)	116.13	19.56	-2156	-1486	670	unknown	1	0	Taiwan	0	937.7	51743907301
New-00224	K&W + Gevorgian et al. (2022)	116.44	19.48	-2531	-1378	1153	composite	2	0	Taiwan	0	746.2	39287620128
New-00225	K&W + Gevorgian et al. (2022)	116.66	19.38	-3059	-1832	1227	simple cone	2	0	Taiwan	0	586.7	35097124607
New-00226	K&W + Gevorgian et al. (2022)	118.46	17.28	-4076	-2515	1561	unknown	2	0	Philippines	0	1077.4	52340647530
New-00227	K&W + Gevorgian et al. (2022)	118.23	17.04	-4106	-3824	282	unknown	1	0	Philippines	0	1007.9	50421245581
New-00228	K&W + Gevorgian et al. (2022)	116.24	16.98	-4216	-2431	1785	simple cone	2	0	Overlapping claim (China)	0	606.6	45490701308
New-00235	K&W + Gevorgian et al. (2022)	112.49	15.68	-2492	-387	2105	composite	3	0	Vietnam	0	1036.9	45803924866
New-00236	K&W + Gevorgian et al. (2022)	112.69	15.79	-2576	-183	2393	composite	3	0	Overlapping claim (China)	15	857.3	51187630600
New-00237	K&W + Gevorgian et al. (2022)	112.46	15.49	-2610	-1433	1177	unknown	2	0	Vietnam	0	1052.2	48669737057
New-00238	K&W + Gevorgian et al. (2022)	112.66	15.39	-3009	-1928	1081	composite	2	0	Overlapping claim (China)	0	844.3	54560202391
New-00239	K&W + Gevorgian et al. (2022)	112.48	15.29	-3385	-534	2851	simple cone	3	0	Vietnam	0	1023.7	51610464402
New-00240	K&W + Gevorgian et al. (2022)	111.93	15.16	-1958	-119	1839	composite	3	0	Vietnam	0	1527.3	32334834276
New-00241	K&W + Gevorgian et al. (2022)	110.96	16.04	-1253	-111	1142	composite	3	0	Vietnam	165	140.2	32874424063
New-00242	K&W + Gevorgian et al. (2022)	111.61	15.33	-1500	-778	722	composite	1	0	Vietnam	20	1418.5	21881805467
New-00243	K&W + Gevorgian et al. (2022)	111.64	14.81	-2046	-355	1691	composite	3	0	Vietnam	0	1631.3	29904443226
New-00245	K&W + Gevorgian et al. (2022)	112.99	14.79	-3520	-1446	2074	composite	2	0	Overlapping claim (China)	0	599.4	50880216472
New-00246	K&W + Gevorgian et al. (2022)	112.94	14.56	-3078	-1258	1820	simple cone	2	0	Overlapping claim (China)	0	651.5	49157890320
New-00247	K&W + Gevorgian et al. (2022)	112.94	15.98	-2622	-1265	1357	composite	2	0	Overlapping claim (China)	15	642.2	54113443464
New-00249	K&W + Gevorgian et al. (2022)	112.26	14.99	-2900	-336	2564	composite	3	0	Vietnam	0	1377.5	49736655894
New-00250	K&W + Gevorgian et al. (2022)	113.01	14.13	-3592	-1568	2024	composite	2	0	Overlapping claim (China)	0	642.1	43623968030
New-00251	K&W + Gevorgian et al. (2022)	112.96	13.59	-3288	-2010	1278	unknown	2	0	Overlapping claim (China)	0	536.1	40434030180
New-00252	K&W + Gevorgian et al. (2022)	112.44	13.23	-3636	-1884	1752	composite	2	0	Vietnam	0	0	49405742851
New-00253	K&W + Gevorgian et al. (2022)	112.64	13.63	-3144	-267	2877	composite	3	0	Vietnam	0	555.6	47660018745
New-00254	K&W + Gevorgian et al. (2022)	111.96	13.69	-2740	-1856	884	composite	1	0	Vietnam	0	1024.8	51051310217
New-00256	K&W + Gevorgian et al. (2022)	111.94	13.41	-2882	-1616	1266	composite	2	0	Vietnam	0	853.5	50864860872
New-00257	K&W + Gevorgian et al. (2022)	111.64	13.16	-3192	-2379	813	unknown	1	0	Vietnam	0	1017.4	52535361049
New-00258	K&W + Gevorgian et al. (2022)	111.88	13.08	-3661	-2216	1445	caldera	2	0	Vietnam	0	817.6	51560113458
New-00259	K&W + Gevorgian et al. (2022)	111.71	12.61	-4006	-2017	1989	composite	2	0	Vietnam	0	833	53657071605
New-00260	K&W + Gevorgian et al. (2022)	111.31	12.34	-3400	-1849	1551	composite	2	0	Vietnam	0	1042.4	54905620990
New-00261	K&W + Gevorgian et al. (2022)	111.34	12.11	-3932	-2114	1818	composite	2	0	Vietnam	0	931.9	57052262640
New-00262	K&W + Gevorgian et al. (2022)	111.09	11.93	-3067	-1960	1107	composite	2	0	Vietnam	0	1066.3	57215259228
New-00263	K&W + Gevorgian et al. (2022)	110.26	11.49	-2285	-644	1641	composite	3	0	Vietnam	0	775.2	68226001669
New-00264	K&W + Gevorgian et al. (2022)	110.41	11.61	-2668	-1678	990	unknown	1	0	Vietnam	0	862.5	65271318403
New-00265	K&W + Gevorgian et al. (2022)	110.31	11.34	-2085	-644	1441	unknown	3	0	Vietnam	0	844.9	67461456964
New-00266	K&W + Gevorgian et al. (2022)	110.56	11.26	-2365	-1586	779	unknown	1	0	Vietnam	0	958.6	63851976884
New-00267	K&W + Gevorgian et al. (2022)	110.51	10.69	-2204	-594	1610	composite	3	0	Vietnam	0	1127.4	67742836030
New-00268	K&W + Gevorgian et al. (2022)	110.26	10.98	-1771	-555	1216	composite	3	0	Vietnam	0	868.5	68317804519
New-00269	K&W + Gevorgian et al. (2022)	110.04	10.86	-1492	-55	1437	unknown	3	0	Vietnam	0	765.9	69989733913
New-00270	K&W + Gevorgian et al. (2022)	110.09	10.66	-1738	-322	1416	unknown	3	0	Vietnam	0	951.3	71026056941
New-00271	K&W + Gevorgian et al. (2022)	110.71	10.23	-3361	-230	3131	composite	3	0	Vietnam	0	1175.8	63600906481
New-00272	K&W + Gevorgian et al. (2022)	110.71	10.44	-2749	-1289	1460	unknown	2	0	Vietnam	0	1150.7	65169838284
New-00273	K&W + Gevorgian et al. (2022)	110.86	10.64	-2895	-1598	1297	composite	2	0	Vietnam	0	1030.8	63568900678
New-00274	K&W + Gevorgian et al. (2022)	109.91	9.88	-2144	-314	1830	composite	3	0	Vietnam	0	1217	76611740967
New-00275	K&W + Gevorgian et al. (2022)	110.24	10.09	-2526	-421	2105	composite	3	0	Vietnam	0	1260.6	73758074687
New-00276	K&W + Gevorgian et al. (2022)	115.79	13.78	-4431	-2987	1444	composite	2	0	Overlapping claim (China)	0	607.2	28316731210
New-00277	K&W + Gevorgian et al. (2022)	117.09	17.63	-3332	-560	2772	composite	3	0	Philippines	0	548.4	53935618552
New-00278	K&W + Gevorgian et al. (2022)	113.29	14.46	-3999	-2147	1852	composite	2	0	Overlapping claim (China)	0	503.4	41111482696
New-00279	K&W + Gevorgian et al. (2022)	113.59	14.86	-3863	-1794	2069	composite	2	0	Overlapping claim (China)	0	423.4	37782629289
New-00280	K&W + Gevorgian et al. (2022)	113.34	14.94	-4464	-2932	1532	unknown	2	0	Overlapping claim (China)	0	346.9	45387333285
New-00281	K&W + Gevorgian et al. (2022)	113.91	14.66	-2104	-232	1872	unknown	3	0	Overlapping claim (China)	0	485.6	34499150003
New-00711	K&W + Gevorgian et al. (2022)	112.23	15.71	-4761	-2164	2597	simple cone	2	0	Vietnam	85	1170.2	31573621346
New-00917	K&W + Gevorgian et al. (2022)	124.59	3.64	-4505	-852	3653	composite	2	0	Indonesia	33178	113.1	53634890499
New-00918	K&W + Gevorgian et al. (2022)	124.69	2.41	-4174	91	4265	simple cone	4	0	Indonesia	216661	473.2	78219516063
New-00919	K&W + Gevorgian et al. (2022)	125.04	2.86	-4374	-766	3608	composite	2	0	Indonesia	184595	421.9	70259929925
New-00920	K&W + Gevorgian et al. (2022)	124.71	2.06	-5034	-3025	2009	composite	2	0	Indonesia	1440263	394.7	95349873267
New-00921	K&W + Gevorgian et al. (2022)	123.86	3.18	-5778	-1878	3900	composite	2	0	Indonesia	0	281.3	53079665249
New-00923	K&W + Gevorgian et al. (2022)	123.34	4.63	-4979	-3389	1590	unknown	2	0	Philippines	0	201.5	54516484207
New-00924	K&W + Gevorgian et al. (2022)	129.54	2.59	-3732	-1435	2297	unknown	2	0	Indonesia	5095	0	28308455399
New-00925	K&W + Gevorgian et al. (2022)	129.66	2.39	-4025	-1495	2530	composite	2	0	Indonesia	0	0	21468735971
New-00929	K&W + Gevorgian et al. (2022)	127.98	6.91	-5637	-3971	1666	composite	2	0	Philippines	0	0	56239718955
New-00930	K&W + Gevorgian et al. (2022)	128.13	7.23	-5962	-3529	2433	composite	2	0	Philippines	0	0	50293409711
New-00931	K&W + Gevorgian et al. (2022)	128.84	4.38	-5981	-3934	2047	composite	2	0	Indonesia	0	282.5	38874203562
New-00932	K&W + Gevorgian et al. (2022)	129.13	3.69	-5687	-3650	2037	composite	2	0	Indonesia	0	382.2	34255435749
New-00933	K&W + Gevorgian et al. (2022)	124.74	15.73	-3526	-2381	1145	composite	2	0	Philippines	0	198.2	67034839542
New-00934	K&W + Gevorgian et al. (2022)	124.78	16.54	-2955	-1635	1320	unknown	2	0	Philippines	0	207.7	62290969388
New-00935	K&W + Gevorgian et al. (2022)	124.58	16.78	-2808	-1307	1501	composite	2	0	Philippines	0	187.1	52323443029
New-00936	K&W + Gevorgian et al. (2022)	124.39	16.76	-3143	-1102	2041	unknown	2	0	Philippines	0	165.9	44071138986
New-00937	K&W + Gevorgian et al. (2022)	123.14	16.14	-4983	-3823	1160	composite	2	0	Philippines	1	0	15015849011
New-00938	K&W + Gevorgian et al. (2022)	123.93	15.73	-4453	-2255	2198	composite	2	0	Philippines	0	194.8	29486999325
New-00939	K&W + Gevorgian et al. (2022)	124.24	16.33	-3757	-1843	1914	composite	2	0	Philippines	0	181.9	42530559431
New-00940	K&W + Gevorgian et al. (2022)	125.39	19.28	-6443	-4778	1665	unknown	2	0	Philippines	0	1026	49961755138
New-00941	K&W + Gevorgian et al. (2022)	125.03	19.43	-6314	-4854	1460	unknown	2	0	Philippines	0	1342.3	37077929220
New-00942	K&W + Gevorgian et al. (2022)	124.93	19.88	-6783	-4504	2279	composite	2	0	Philippines	0	1183	34866936273
New-00995	K&W + Gevorgian et al. (2022)	125.01	17.13	-3063	-1722	1341	composite	2	0	Philippines	0	202.3	64729726176
New-00996	K&W + Gevorgian et al. (2022)	125.01	17.14	-2948	-2838	110	composite	1	0	Philippines	0	202	64659363038
New-00997	K&W + Gevorgian et al. (2022)	125.14	17.44	-4294	-2427	1867	unknown	2	0	Philippines	0	327.5	62742552361
New-00998	K&W + Gevorgian et al. (2022)	125.38	16.48	-3780	-2735	1045	unknown	2	0	Philippines	0	187.3	77900353768
New-00999	K&W + Gevorgian et al. (2022)	127.36	13.18	-5458	-3685	1773	composite	2	0	Philippines	0	0	61668331585
New-01010	K&W + Gevorgian et al. (2022)	140.53	1.09	-3703	-3194	509	unknown	1	0	Indonesia	0	0	26463878857
New-01011	K&W + Gevorgian et al. (2022)	140.63	1.19	-3706	-3217	489	unknown	1	0	Indonesia	0	0	25759291345
New-01022	K&W + Gevorgian et al. (2022)	139.84	0.38	-3429	-2776	653	unknown	1	0	Indonesia	0	0	23657707827
New-01023	K&W + Gevorgian et al. (2022)	139.71	0.34	-3429	-2769	660	unknown	1	0	Indonesia	0	0	22572133078
New-01024	K&W + Gevorgian et al. (2022)	139.79	1.03	-4320	-3449	871	unknown	1	0	Indonesia	0	0	26622716361
New-01025	K&W + Gevorgian et al. (2022)	138.28	0.34	-4044	-3176	868	unknown	1	0	Indonesia	0	0	21096619395
New-01026	K&W + Gevorgian et al. (2022)	138.34	0.04	-4278	-3118	1160	composite	2	0	Indonesia	0	0	25826256347
New-01027	K&W + Gevorgian et al. (2022)	136.86	0.23	-4534	-3202	1332	simple cone	2	0	Indonesia	0	0	30450479176
New-01028	K&W + Gevorgian et al. (2022)	132.89	0.59	-4202	-3073	1129	unknown	2	0	Indonesia	0	0	15921666134
New-01029	K&W + Gevorgian et al. (2022)	132.51	1.01	-4277	-2567	1710	composite	2	0	Indonesia	0	0	14329325080
New-01030	K&W + Gevorgian et al. (2022)	134.14	0.08	-4136	-2266	1870	unknown	2	0	Indonesia	6854	0	30622448613
New-01031	K&W + Gevorgian et al. (2022)	132.61	0.69	-4287	-2614	1673	unknown	2	0	Indonesia	0	0	13360380454
New-01032	K&W + Gevorgian et al. (2022)	132.56	1.58	-5145	-3037	2108	unknown	2	0	Indonesia	0	0	24539586224
New-01035	K&W + Gevorgian et al. (2022)	130.86	1.98	-4223	-2555	1668	composite	2	0	Indonesia	0	0	17432395660
New-01036	K&W + Gevorgian et al. (2022)	135.56	1.63	-4309	-3417	892	composite	1	0	Indonesia	0	0	17959244867
New-01037	K&W + Gevorgian et al. (2022)	135.78	1.56	-4428	-3001	1427	composite	2	0	Indonesia	0	0	17256757895
New-01038	K&W + Gevorgian et al. (2022)	135.96	1.51	-4297	-3346	951	composite	1	0	Indonesia	0	0	16478224161
New-01039	K&W + Gevorgian et al. (2022)	135.84	2.53	-4365	-3846	519	unknown	1	0	Indonesia	0	0	12724051878
New-01040	K&W + Gevorgian et al. (2022)	135.38	2.69	-4406	-3404	1002	composite	2	0	Indonesia	0	0	11601407452
New-01041	K&W + Gevorgian et al. (2022)	135.69	2.74	-4477	-3844	633	unknown	1	0	Indonesia	0	0	12888279443
New-01042	K&W + Gevorgian et al. (2022)	136.33	2.39	-4360	-3852	508	unknown	1	0	Indonesia	0	0	14049185043
New-01043	K&W + Gevorgian et al. (2022)	136.46	3.09	-4640	-3610	1030	composite	2	0	Indonesia	0	0	16941260220
New-01102	K&W + Gevorgian et al. (2022)	135.74	2.08	-4408	-3861	547	unknown	1	0	Indonesia	0	0	11833176763
New-01103	K&W + Gevorgian et al. (2022)	135.58	2.19	-4446	-3287	1159	simple cone	2	0	Indonesia	0	0	11643513802
New-01104	K&W + Gevorgian et al. (2022)	135.94	2.04	-4373	-3625	748	composite	1	0	Indonesia	0	0	12301125983
New-01105	K&W + Gevorgian et al. (2022)	136.46	1.08	-4507	-3947	560	unknown	1	0	Indonesia	0	0	20894318823
New-01106	K&W + Gevorgian et al. (2022)	132.84	1.03	-4402	-2690	1712	composite	2	0	Indonesia	0	0	18168092125
New-01107	K&W + Gevorgian et al. (2022)	134.19	1.56	-5017	-3026	1991	composite	2	0	Indonesia	451	0	25152858797
New-01823	K&W + Gevorgian et al. (2022)	97.74	-2.88	-4933	-3319	1614	unknown	2	0	Indonesia	0	0	8394352265
New-01952	K&W + Gevorgian et al. (2022)	95.29	-1.83	-4946	-3976	970	unknown	1	0	Indonesia	0	0	8628384655
New-01953	K&W + Gevorgian et al. (2022)	96.78	-1.09	-5069	-2980	2089	composite	2	0	Indonesia	0	0	2435071064
New-01954	K&W + Gevorgian et al. (2022)	96.88	-0.44	-5290	-3156	2134	composite	2	0	Indonesia	0	0	7051519818
New-01957	K&W + Gevorgian et al. (2022)	97.98	-4.18	-5237	-3894	1343	unknown	2	0	Indonesia	0	0	6491133573
New-01958	K&W + Gevorgian et al. (2022)	98.31	-2.84	-5098	-3777	1321	composite	2	0	Indonesia	0	0	6056910756
New-01959	K&W + Gevorgian et al. (2022)	96.26	-3.04	-5201	-4144	1057	unknown	2	0	Indonesia	0	0	8257086683
New-01977	K&W + Gevorgian et al. (2022)	114.64	-11.58	-4649	-3408	1241	guyot	5	0	Indonesia	0	0	12953735551
New-02074	K&W + Gevorgian et al. (2022)	97.49	-4.28	-4629	-3567	1062	unknown	2	0	Indonesia	0	0	4015797570
New-02090	K&W + Gevorgian et al. (2022)	120.29	-12.46	-2977	-1692	1285	unknown	2	0	Indonesia	0	0	3254720404
New-02091	K&W + Gevorgian et al. (2022)	120.08	-11.78	-4497	-2944	1553	composite	2	0	Indonesia	0	0	1731045499
New-02279	K&W + Gevorgian et al. (2022)	120.64	-13.23	-2346	125	2471	simple cone	4	0	Indonesia	0	0	34482369808
New-02280	K&W + Gevorgian et al. (2022)	133.49	-0.48	-3932	-1184	2748	unknown	2	0	Indonesia	242896	0	41556677401
New-02281	K&W + Gevorgian et al. (2022)	134.61	-0.31	-2790	-1333	1457	unknown	2	0	Indonesia	134828	0	36181225683
New-02282	K&W + Gevorgian et al. (2022)	134.54	-0.58	-2703	-1416	1287	unknown	2	0	Indonesia	215151	0	37899435623
New-02283	K&W + Gevorgian et al. (2022)	134.96	-0.43	-1992	-444	1548	unknown	3	0	Indonesia	33138	0	27925565540
New-02327	K&W + Gevorgian et al. (2022)	127.78	-6.03	-5366	-2873	2493	unknown	2	0	Indonesia	144	0	12159269196
New-02328	K&W + Gevorgian et al. (2022)	127.53	-6.11	-4997	-2814	2183	unknown	2	0	Indonesia	144	0	11321117693
New-02329	K&W + Gevorgian et al. (2022)	128.26	-5.33	-4300	-1088	3212	composite	2	0	Indonesia	144	0	17010253054
New-02330	K&W + Gevorgian et al. (2022)	128.98	-5.13	-5424	-3360	2064	unknown	2	0	Indonesia	18	0	19300883534
New-02331	K&W + Gevorgian et al. (2022)	129.41	-4.78	-4769	-1787	2982	unknown	2	0	Indonesia	18928	0	20668842027
New-02332	K&W + Gevorgian et al. (2022)	128.63	-4.49	-4927	-909	4018	composite	2	0	Indonesia	106001	0	20604712187
New-02333	K&W + Gevorgian et al. (2022)	128.64	-4.03	-3510	-1455	2055	unknown	2	0	Indonesia	698488	0	18997908899
New-02334	K&W + Gevorgian et al. (2022)	128.96	-4.29	-2945	-1362	1583	composite	2	0	Indonesia	73505	0	15607711087
New-02335	K&W + Gevorgian et al. (2022)	127.94	-4.88	-4792	-1405	3387	composite	2	0	Indonesia	144	0	16778981948
New-02336	K&W + Gevorgian et al. (2022)	127.19	-5.36	-3427	-1452	1975	composite	2	0	Indonesia	144	0	18771736677
New-02337	K&W + Gevorgian et al. (2022)	127.16	-5.71	-3849	-1428	2421	composite	2	0	Indonesia	144	0	18161909238
New-02338	K&W + Gevorgian et al. (2022)	126.73	-4.68	-4056	-430	3626	composite	3	0	Indonesia	8506	0	28274888910
New-02339	K&W + Gevorgian et al. (2022)	126.89	-4.41	-4679	-1961	2718	unknown	2	0	Indonesia	46590	0	28841019668
New-02340	K&W + Gevorgian et al. (2022)	126.33	-4.68	-4078	-1310	2768	unknown	2	0	Indonesia	40	0	48840323392
New-02341	K&W + Gevorgian et al. (2022)	125.79	-4.93	-3912	-2159	1753	unknown	2	0	Indonesia	0	0	70043701985
New-02342	K&W + Gevorgian et al. (2022)	125.06	-5.14	-4676	-2070	2606	composite	2	0	Indonesia	934	0	66123914777
New-02343	K&W + Gevorgian et al. (2022)	125.34	-4.99	-4153	-1985	2168	composite	2	0	Indonesia	0	0	72017485294
New-02344	K&W + Gevorgian et al. (2022)	125.54	-5.83	-3234	-1862	1372	unknown	2	0	Indonesia	0	0	57653525108
New-02345	K&W + Gevorgian et al. (2022)	126.44	-5.31	-4066	-2297	1769	unknown	2	0	Indonesia	0	0	26121792118
New-02346	K&W + Gevorgian et al. (2022)	126.31	-5.68	-5109	-2845	2264	composite	2	0	Indonesia	0	0	33182790386
New-02347	K&W + Gevorgian et al. (2022)	126.06	-5.31	-4233	-2696	1537	unknown	2	0	Indonesia	0	0	48041914981
New-02348	K&W + Gevorgian et al. (2022)	126.16	-5.03	-4041	-2788	1253	unknown	2	0	Indonesia	0	0	50200771655
New-02349	K&W + Gevorgian et al. (2022)	126.21	-5.46	-4209	-2619	1590	composite	2	0	Indonesia	0	0	39916304727
New-02350	K&W + Gevorgian et al. (2022)	126.79	-5.24	-3632	-2563	1069	unknown	2	0	Indonesia	80	0	19045107257
New-02351	K&W + Gevorgian et al. (2022)	127.28	-4.41	-3941	-2012	1929	unknown	2	0	Indonesia	21382	0	30425457958
New-02352	K&W + Gevorgian et al. (2022)	127.56	-4.31	-4416	-2602	1814	unknown	2	0	Indonesia	274172	0	31847655647
New-02353	K&W + Gevorgian et al. (2022)	127.98	-4.56	-5041	-3367	1674	unknown	2	0	Indonesia	187073	0	27847899116
New-02354	K&W + Gevorgian et al. (2022)	126.21	-4.01	-4954	-1327	3627	composite	2	0	Indonesia	78941	0	64615734392
New-02355	K&W + Gevorgian et al. (2022)	127.31	-4.04	-4216	38	4254	composite	4	0	Indonesia	235319	0	33375259323
New-02356	K&W + Gevorgian et al. (2022)	127.58	-3.73	-3993	-1164	2829	composite	2	0	Indonesia	742363	0	39475522655
New-02357	K&W + Gevorgian et al. (2022)	125.03	-2.66	-4657	-2727	1930	unknown	2	0	Indonesia	18971	0	32820946816
New-02358	K&W + Gevorgian et al. (2022)	124.44	-3.04	-5452	-3267	2185	unknown	2	0	Indonesia	0	0	45878160066
New-02359	K&W + Gevorgian et al. (2022)	124.84	-3.78	-5279	-3089	2190	composite	2	0	Indonesia	0	0	74092266364
New-02360	K&W + Gevorgian et al. (2022)	125.21	-3.94	-5019	-3282	1737	composite	2	0	Indonesia	0	0	102449000000
New-02361	K&W + Gevorgian et al. (2022)	125.66	-3.08	-5430	-2241	3189	composite	2	0	Indonesia	40712	0	100928000000
New-02362	K&W + Gevorgian et al. (2022)	125.88	-2.84	-5026	-2062	2964	composite	2	0	Indonesia	97276	0	101823000000
New-02363	K&W + Gevorgian et al. (2022)	126.41	-2.61	-4931	-3273	1658	unknown	2	0	Indonesia	125878	0	109684000000
New-02364	K&W + Gevorgian et al. (2022)	123.56	-2.74	-4828	-3252	1576	unknown	2	0	Indonesia	16041	0	63921104986
New-02365	K&W + Gevorgian et al. (2022)	127.71	-5.81	-5025	-2764	2261	unknown	2	0	Indonesia	144	0	14879636723
New-02366	K&W + Gevorgian et al. (2022)	128.13	-5.73	-5036	-3557	1479	unknown	2	0	Indonesia	144	0	15292557632
New-02367	K&W + Gevorgian et al. (2022)	128.04	-5.56	-4607	-1514	3093	unknown	2	0	Indonesia	144	0	16186002546
New-02368	K&W + Gevorgian et al. (2022)	126.84	-6.86	-4662	-2308	2354	composite	2	0	Indonesia	3964	0	17047987154
New-02369	K&W + Gevorgian et al. (2022)	127.78	-6.83	-5175	-3354	1821	unknown	2	0	Indonesia	1932	0	13247733969
New-02370	K&W + Gevorgian et al. (2022)	124.18	-6.49	-4353	-2384	1969	unknown	2	0	Indonesia	42159	0	22250483475
New-02371	K&W + Gevorgian et al. (2022)	124.11	-6.89	-4207	-2105	2102	unknown	2	0	Indonesia	2138	0	25650214966
New-02372	K&W + Gevorgian et al. (2022)	124.44	-6.68	-4301	-2243	2058	unknown	2	0	Indonesia	17973	0	25132140260
New-02373	K&W + Gevorgian et al. (2022)	124.54	-6.79	-4208	-2814	1394	simple cone	2	0	Indonesia	2	0	30924736619
New-02374	K&W + Gevorgian et al. (2022)	124.69	-6.66	-4104	-2587	1517	unknown	2	0	Indonesia	7	0	41033061165
New-02375	K&W + Gevorgian et al. (2022)	124.89	-6.68	-4456	-2421	2035	composite	2	0	Indonesia	0	0	47990761798
New-02376	K&W + Gevorgian et al. (2022)	125.01	-7.06	-4302	-1920	2382	unknown	2	0	Indonesia	0	0	51132632133
New-02377	K&W + Gevorgian et al. (2022)	125.21	-7.08	-4298	-2528	1770	unknown	2	0	Indonesia	0	0	50906466428
New-02378	K&W + Gevorgian et al. (2022)	125.43	-7.13	-4554	-2345	2209	unknown	2	0	Indonesia	4008	0	44996869216
New-02379	K&W + Gevorgian et al. (2022)	125.86	-7.21	-4602	-972	3630	composite	2	0	Indonesia	20336	0	41212707402
New-02380	K&W + Gevorgian et al. (2022)	125.51	-6.36	-4320	-1825	2495	unknown	2	0	Indonesia	0	0	48847432132
New-02381	K&W + Gevorgian et al. (2022)	126.11	-7.26	-4844	-1956	2888	simple cone	2	0	Indonesia	24009	0	36734130280
New-02382	K&W + Gevorgian et al. (2022)	125.33	-7.71	-4613	-2258	2355	simple cone	2	0	Indonesia	424938	0	79549229505
New-02383	K&W + Gevorgian et al. (2022)	125.71	-7.59	-4579	-1419	3160	composite	2	0	Indonesia	36790	0	68988643221
New-02384	K&W + Gevorgian et al. (2022)	125.78	-7.43	-4480	-2185	2295	unknown	2	0	Indonesia	33125	0	53528427567
New-02385	K&W + Gevorgian et al. (2022)	127.68	-7.86	-3086	-1436	1650	simple cone	2	0	Indonesia	61242	0	39125602906
New-02386	K&W + Gevorgian et al. (2022)	127.09	-7.69	-3484	-464	3020	unknown	3	0	Indonesia	99606	0	40870094522
New-02387	K&W + Gevorgian et al. (2022)	128.14	-7.74	-4011	-1521	2490	unknown	2	0	Indonesia	38218	0	26511426882
New-02388	K&W + Gevorgian et al. (2022)	128.09	-7.36	-4352	-1658	2694	unknown	2	0	Indonesia	33162	0	16434762670
New-02389	K&W + Gevorgian et al. (2022)	128.01	-7.91	-2966	-1671	1295	unknown	2	0	Indonesia	46436	0	35086608481
New-02390	K&W + Gevorgian et al. (2022)	127.88	-7.79	-3675	-1675	2000	unknown	2	0	Indonesia	46405	0	34830456249
New-02391	K&W + Gevorgian et al. (2022)	127.08	-7.43	-5041	-634	4407	unknown	3	0	Indonesia	22318	0	30801637164
New-02392	K&W + Gevorgian et al. (2022)	126.98	-7.28	-5270	-2181	3089	unknown	2	0	Indonesia	22299	0	20824467153
New-02393	K&W + Gevorgian et al. (2022)	127.76	-7.44	-4947	105	5052	simple cone	4	0	Indonesia	42576	0	21314400052
New-02394	K&W + Gevorgian et al. (2022)	129.29	-6.38	-4367	-2134	2233	composite	2	0	Indonesia	815	0	8816530817
New-02395	K&W + Gevorgian et al. (2022)	130.28	-6.08	-5215	-1544	3671	unknown	2	0	Indonesia	234	0	14722370225
New-02396	K&W + Gevorgian et al. (2022)	130.04	-5.98	-3872	-2511	1361	unknown	2	0	Indonesia	234	0	15396749314
New-02397	K&W + Gevorgian et al. (2022)	129.94	-5.88	-3955	-2935	1020	unknown	2	0	Indonesia	234	0	16367959783
New-02398	K&W + Gevorgian et al. (2022)	129.66	-5.86	-4673	-3160	1513	unknown	2	0	Indonesia	533	0	16407253279
New-02399	K&W + Gevorgian et al. (2022)	130.44	-5.68	-4166	2	4168	composite	4	0	Indonesia	234	0	19376993462
New-02400	K&W + Gevorgian et al. (2022)	130.34	-5.31	-4491	-475	4016	composite	3	0	Indonesia	14850	0	21964981851
New-02401	K&W + Gevorgian et al. (2022)	130.39	-4.94	-4776	-2815	1961	composite	2	0	Indonesia	18928	0	22123345055
New-02402	K&W + Gevorgian et al. (2022)	130.44	-7.18	-4959	-1224	3735	unknown	2	0	Indonesia	19024	0	10948388609
New-02403	K&W + Gevorgian et al. (2022)	130.61	-7.06	-4663	-1818	2845	composite	2	0	Indonesia	26933	0	10341732032
New-02404	K&W + Gevorgian et al. (2022)	130.93	-6.89	-4875	-2787	2088	unknown	2	0	Indonesia	42416	0	11626758013
New-02405	K&W + Gevorgian et al. (2022)	129.26	-7.69	-4593	-1651	2942	unknown	2	0	Indonesia	13539	0	15421938438
New-02406	K&W + Gevorgian et al. (2022)	123.39	-6.16	-4047	-1775	2272	unknown	2	0	Indonesia	181648	0	31102426559
New-02407	K&W + Gevorgian et al. (2022)	122.89	-7.63	-3432	-1468	1964	unknown	2	0	Indonesia	284881	0	66696272201
New-02408	K&W + Gevorgian et al. (2022)	121.76	-7.83	-4726	-1810	2916	unknown	2	0	Indonesia	212660	0	82901381272
New-02409	K&W + Gevorgian et al. (2022)	122.69	-7.93	-3377	-449	2928	unknown	3	0	Indonesia	585710	0	76028185009
New-02410	K&W + Gevorgian et al. (2022)	121.86	-8.26	-3292	481	3773	composite	4	0	Indonesia	804687	81.8	84247533098
New-02411	K&W + Gevorgian et al. (2022)	124.06	-6.38	-4317	-2722	1595	composite	2	0	Indonesia	52888	0	20288462736
New-02412	K&W + Gevorgian et al. (2022)	124.29	-6.61	-4297	-3209	1088	composite	2	0	Indonesia	24648	0	23644740757
New-02413	K&W + Gevorgian et al. (2022)	122.39	-6.53	-2107	-1160	947	unknown	1	0	Indonesia	33536	0	29858746039
New-02414	K&W + Gevorgian et al. (2022)	120.91	-5.31	-2286	-1154	1132	unknown	2	0	Indonesia	1070757	0	59263825006
New-02415	K&W + Gevorgian et al. (2022)	126.83	-5.44	-4198	-2526	1672	unknown	2	0	Indonesia	80	0	19065540690
Nila	GVP	129.5	-6.73	-3820	675	4495	composite	4	265060	Indonesia	1208	0	8873026621
North Kawio	GVP	125.468	4.684	-3619	147	3766	composite	4	267075	Indonesia	29473	0	76688036669
Paluweh	GVP	121.708	-8.32	-2937	776	3713	simple cone	4	264150	Indonesia	925442	104.5	83930815931
Pengchiahsu	GVP	122.08	25.63	-216	49	265	simple cone	4	281805	Taiwan	6875369	2706.4	715817000000
Serua	GVP	130.017	-6.312	-4591	459	5050	composite	4	265070	Indonesia	601	0	10576556669
Teon	GVP	129.144	-6.976	-2996	652	3648	composite	4	265050	Indonesia	1407	0	9910005830
Unnamed	GVP	121.75	20.33	-3076	286	3362	composite	4	274050	Philippines	20925	2123	127519000000
Veteran	GVP	109.05	9.83	-213	-6	207	composite	3	275070	Vietnam	28953	665.3	60029994004
