# Supplementary material for: SEATANI: hazards from seamounts in Southeast Asia, Taiwan, and Andaman and Nicobar Islands (eastern India)
Source: Copernicus journal article supplement (doi:10.5194/nhess-24-1203-2024), 2024-04-05
Supplement: Supplementary file 3 [file nhess-24-1203-2024-supplement.zip]

Archive with 4 entries (4 files):
- Supplement.pdf
- Table S1.xlsx
- nhess-24-1203-2024-supplement-title-page.pdf
- Table S2.xlsx
