# Supplementary material for: SEATANI: hazards from seamounts in Southeast Asia, Taiwan, and Andaman and Nicobar Islands (eastern India)
Source: Copernicus journal article supplement (doi:10.5194/nhess-24-1203-2024), 2024-04-05
Supplement: Supplementary file 3 [file Table S2.xlsx]

## Sheet: Sheet1
		Table S2. List of GVP potential seamounts. In green those included in our catalogue, and in red those excluded for elevation > 1000 m a.s.l. and/or emerged volume > 30%.
FID	Volcano_Nu	Volcano Name	Latitude	Longitude	Elevation (m a.s.l.)	Volume_emerged (%)	Decision
0	265090	Banda Api	-4.523	129.881	596	9.97817	Included
1	267030	Banua Wuhu	3.138	125.491	-5	2.8187	Included
2	260010	Barren Island	12.278	93.858	354	0.581549	Included
3	264260	Batu Tara	-7.791	123.585	633	0.621601	Included
4	266010	Colo	-0.162	121.601	404	12.2853	Included
5	274020	Didicas	19.077	122.202	228	< 1	Included
6	264839	Gilibanta	-8.42	119.32	363	29.9648	Included
7	265030	Gunungapi Wetar	-6.642	126.65	282	< 1	Included
8	281803	Huapinghsu	25.424	121.946	51	< 1	Included
19	275060	Ile des Cendres	10.158	109.014	-20	0	Included
25	267070	Kawalusu	4.232	125.329	239	< 1	Included
21	267090	Kawio Barat	4.675	125.088	-1874	0	Included
9	262000	Krakatau	-6.102	105.423	155	9.99181	Included
24	267060	Lipang	3.911	125.39	126	< 1	Included
10	265080	Manuk	-5.543	130.303	257	< 1	Included
11	281804	Mienhuayu	25.484	122.106	29	1.34341	Included
22	267065	Napo Taroare	4.048	125.345	0	< 1	Included
12	260001	Narcondum	13.43	94.28	710	2.8847	Included
13	265060	Nila	-6.73	129.5	781	1.84684	Included
23	267075	North Kawio	4.684	125.468	109	7.51887	Included
14	264150	Paluweh	-8.32	121.708	875	8.16598	Included
15	281805	Pengchiahsu	25.63	122.08	120	6.92308	Included
16	265070	Serua	-6.312	130.017	608	1.21297	Included
17	265050	Teon	-6.976	129.144	728	2.19112	Included
18	274050	Unnamed	20.33	121.75	-24	0	Included
20	275070	Veteran	9.83	109.05	-50	0	Included
110	267040	Awu	3.689	125.447	1318	53.8418	Excluded
165	274030	Babuyan Claro	19.524	121.95	1064	17.0631	Excluded
127	271010	Balut	5.4	125.375	862	88.9978	Excluded
137	271080	Camiguin	9.203	124.673	1552	51.1459	Excluded
119	268060	Gamalama	0.8	127.33	1715	80.7634	Excluded
118	268052	Hiri	0.9	127.32	630	64.127	Excluded
167	274060	Iraya	20.469	122.01	1009	50.5554	Excluded
108	267020	Karangetang	2.781	125.407	1797	13.0614	Excluded
168	275020	Ly Son Group	15.38	109.12	157	59.313	Excluded
123	268070	Makian	0.32	127.4	1357	62.6485	Excluded
121	268062	Mare	0.57	127.4	308	80.7634	Excluded
122	268063	Moti	0.454	127.411	927	62.6485	Excluded
64	263340	Ruang	2.3	125.37	725	38.8221	Excluded
72	264050	Sangeang Api	-8.2	119.07	1912	48.3505	Excluded
120	268061	Tidore	0.658	127.4	1730	80.7634	Excluded
124	268071	Tigalalu	0.07	127.42	422	33.6767	Excluded
